# Supplementary material for: Dexamethasone Induces Changes in Osteogenic Differentiation of Human Mesenchymal Stromal Cells via SOX9 and PPARG, but Not RUNX2
Source: MDPI journal article supplement (doi:10.3390/ijms22094785), 2021-04-30
Supplement: s1 [file s1]

## Supplementary material to:

**Elena Della Bella, Antoine Buetti-Dinh, Ginevra Licandro, Paras Ahmad, Valentina Basoli, Mauro Alini, Martin James Stoddart. Dexamethasone induces changes in osteogenic differentiation of human mesenchymal stromal cells via SOX9 and PPARG, but not RUNX2.**

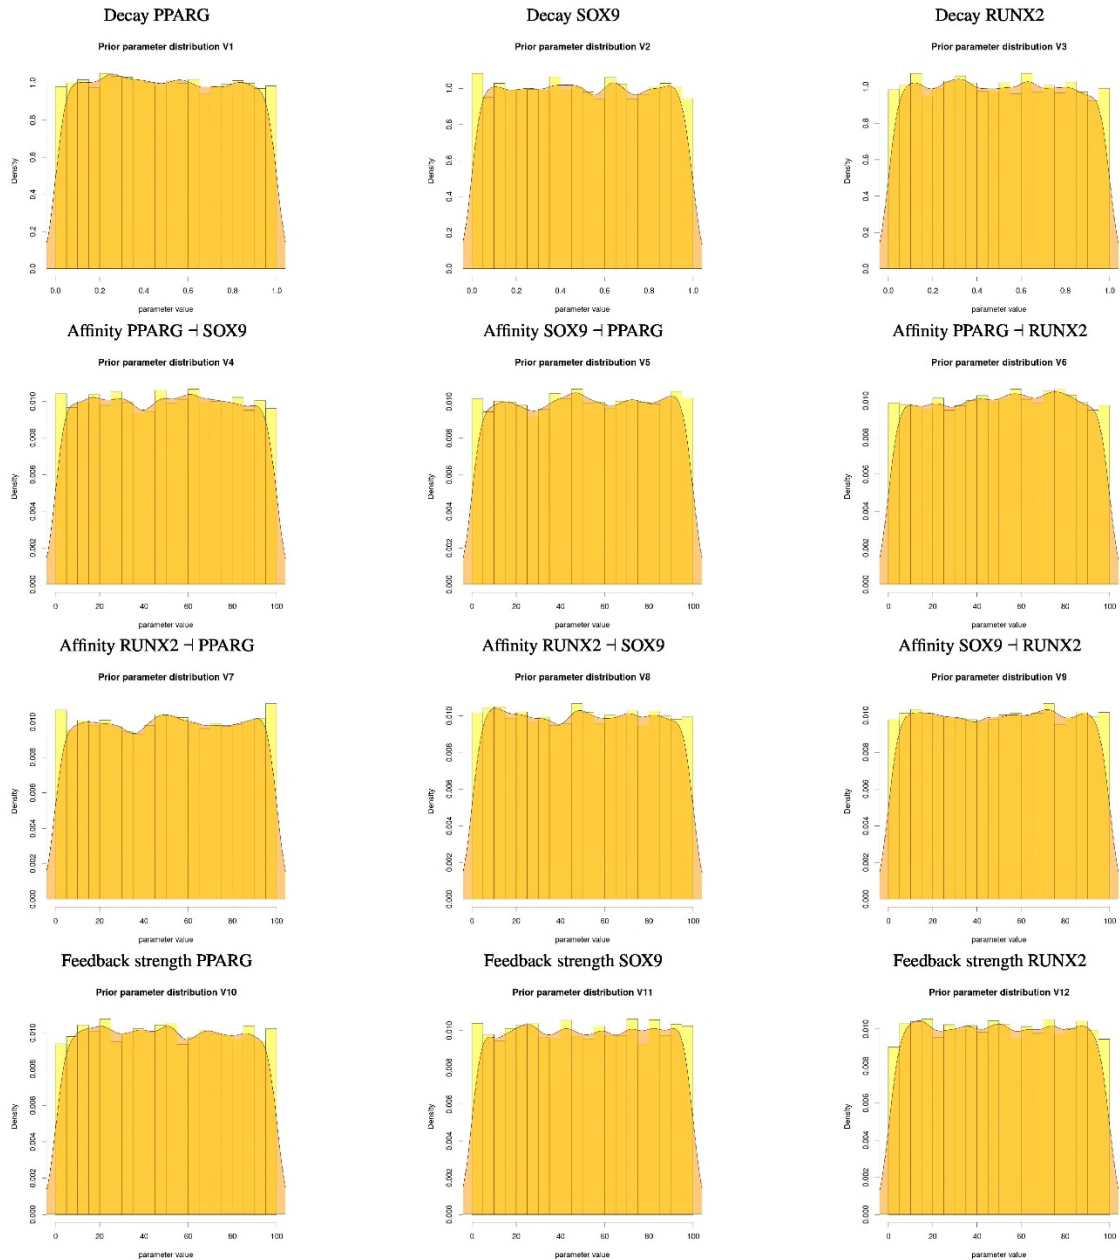

**Figure S1.** Prior (uniformly random) distributions. The number of bins is estimated with the R Sturges method and the density estimation shown in continuous line. Decay indicates a first order reaction rate of species degradation, while affinity and feedback strength are defined as dissociation binding constants, the smaller the value the stronger the molecular interaction.

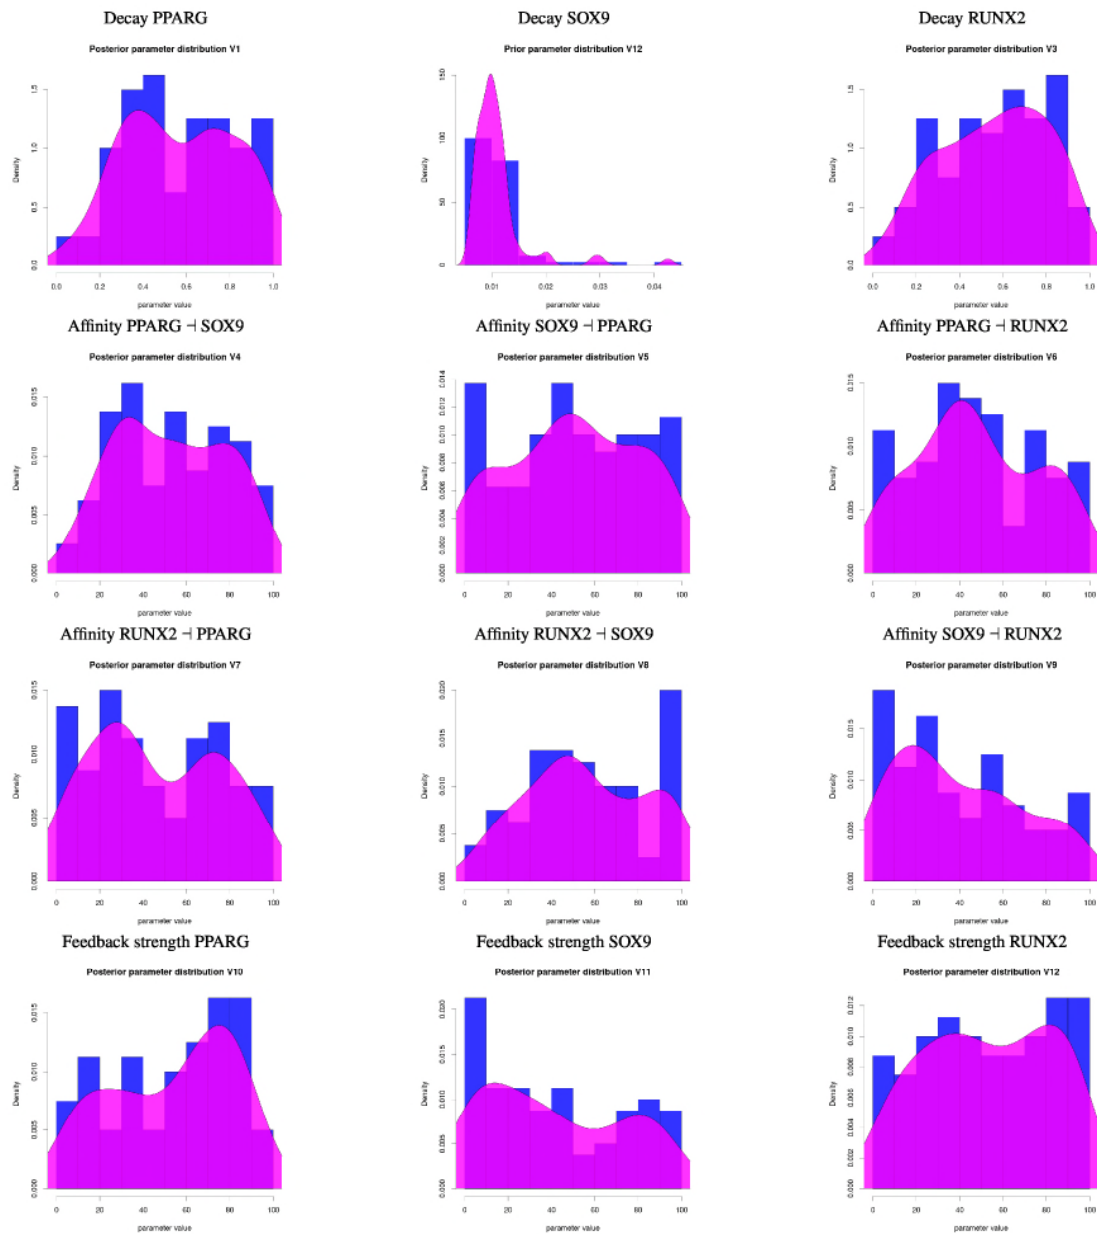

**Figure S2.** Posterior (selected by ABC) distributions. The number of bins is estimated with the R Sturges method and the density estimation shown in continuous line. Decay indicates a first order reaction rate of species degradation, while affinity and feedback strength are defined as dissociation binding constants, the smaller the value the stronger the molecular interaction.

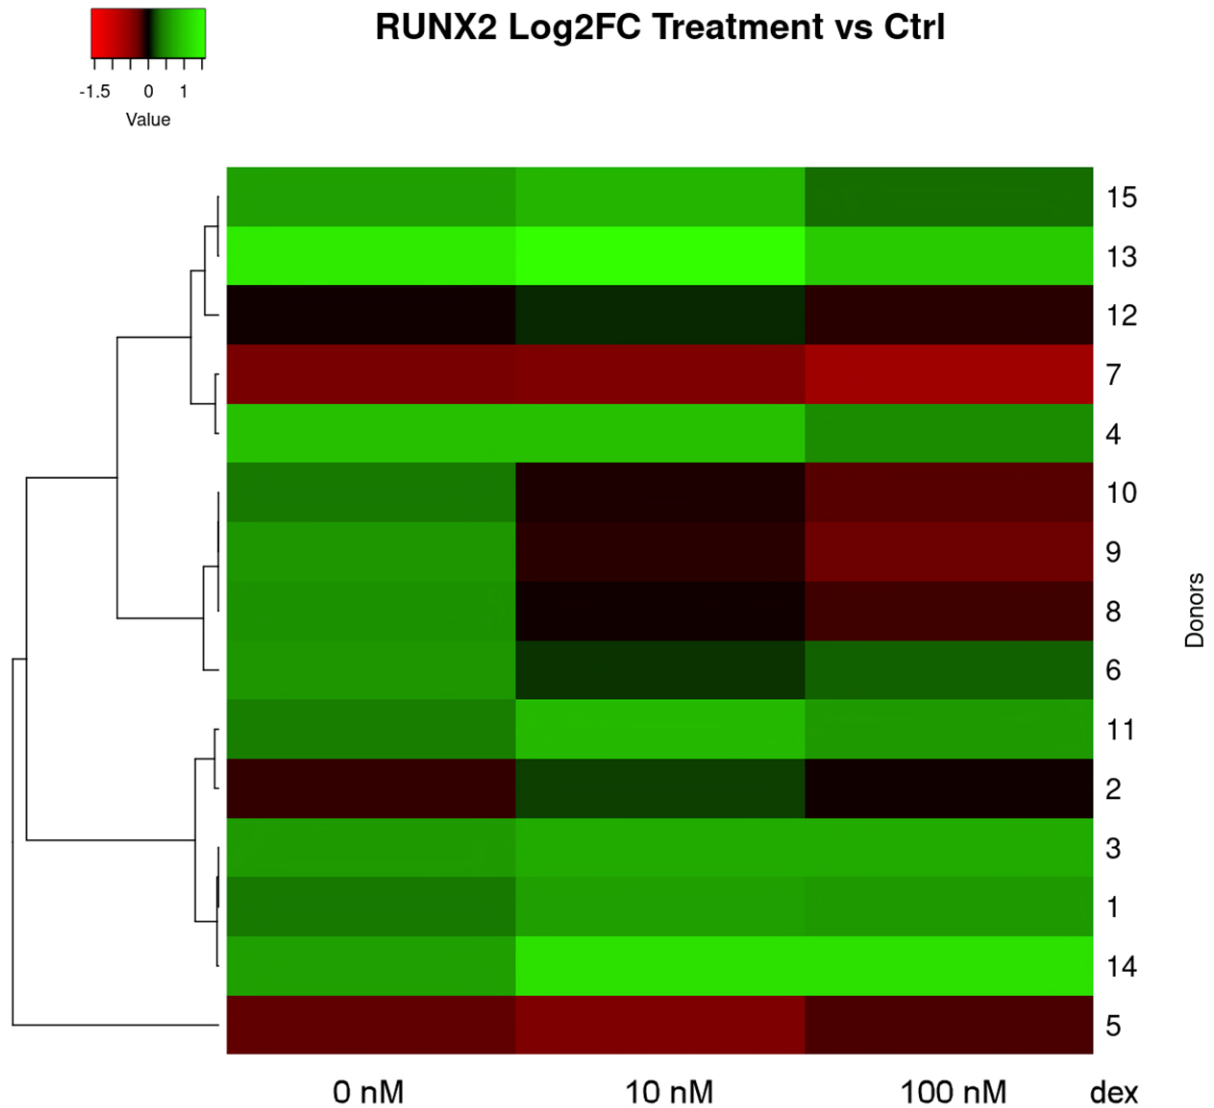

**Figure S3.** Gene expression profiling and donor clustering analysis of RUNX2 in response to pro-osteogenic medium with different concentration of dex (0 nM, 10 nM, 100 nM) in isolated hBMSCs. The data were visualised by a heat-map and colour legend shows the relative expression normalised to the expression level of the respective untreated condition (Log2FC).

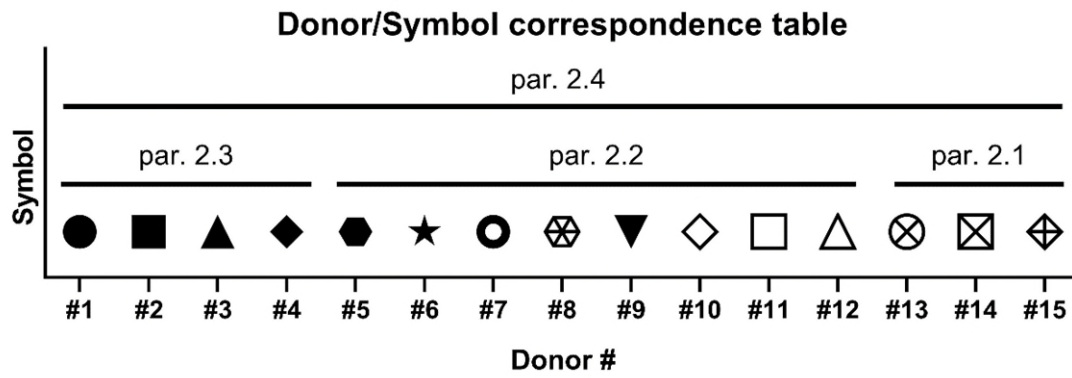

**Figure S4.** Summary of BMSC donors used in each experiment, with reference to the paragraph where the results are showed. Each donor is represented throughout the manuscript using a unique symbol.

**Table S1:** List and details of primers and probes used for gene expression analysis

| GENE                  | ASSAY DETAILS                                                                                                                            |
|-----------------------|------------------------------------------------------------------------------------------------------------------------------------------|
| <b><i>BGLAP*</i></b>  | Forward primer: 5'-AAGAGACCCAGGCGCTACCT-3'<br>Reverse primer: 5'-AACTCGTCACAGTCCGGATTG-3'<br>Probe: 5'-ATGGCTGGGAGCCCCAGTCCC-3'          |
| <b><i>DLX5*</i></b>   | TaqMan Gene Expression Assay Hs00193291_m1                                                                                               |
| <b><i>IBSP*</i></b>   | TaqMan Gene Expression Assay Hs00173720_m1                                                                                               |
| <b><i>PPARG**</i></b> | TaqMan Gene Expression Assay Hs00234592_m1                                                                                               |
| <b><i>RPLP0*</i></b>  | Forward primer: 5'-TGGGCAAGAACACCATGATG-3'<br>Reverse primer: 5'-CGGATATGAGGCAGCAGTTTC-3'<br>Probe: 5'-AGGGCACCTGGAAAACAACCCAGC-3'       |
| <b><i>RUNX2*</i></b>  | Forward primer: 5'-AGCAAGGTTCAACGATCTGAGAT-3'<br>Reverse primer: 5'-TTTGTGAAGACGGTTATGGTCAA-3'<br>Probe: 5'-TGAAACTCTTGCCTCGTCCACTCCG-3' |
| <b><i>RUNX3**</i></b> | TaqMan Gene Expression Assay Hs01091094_m1                                                                                               |
| <b><i>SOX9**</i></b>  | TaqMan Gene Expression Assay Hs00165814_m1                                                                                               |
| <b><i>SP7*</i></b>    | Forward primer: 5'-CCTGCTTGAGGAGGAAGTTCA-3'<br>Reverse primer: 5'-GGCTAGAGCCACCAAATTTGC-3'<br>Probe: 5'-TCCCCTGGCCATGCTGACGG-3'          |

\* Custom sequences (synthesized from MicroSynth). Reporter dye: 6-carboxyfluorescein (FAM); quencher: 6-carboxy-N, N, N', N'-tetramethylrhodamine (TAMRA). \*\* Commercially available assays (Thermo Fisher) Reporter dye: FAM; quencher: non-fluorescent quencher, minor groove binder (NFQ-MGB).

Table S2

# Log2FC values (treatment vs CRL)

| Donor | RUNX2_0nM    | RUNX2_10nM   | RUNX2_100nM  | SOX9_0nM    | SOX9_10nM    | SOX9_100nM   | PPARG_0nM    | PPARG_10nM  | PPARG_100nM |
|-------|--------------|--------------|--------------|-------------|--------------|--------------|--------------|-------------|-------------|
| #1    | 0.364529598  | 0.621267764  | 0.586432389  | 0.497499659 | -1.087462841 | -1.86507042  | -0.277984747 | 2.394440595 | 2.911839812 |
| #2    | -0.129691077 | 0.18651203   | -0.03970971  | 0.033947332 | -0.637429921 | -1.691877705 | 0.309104055  | 1.501749132 | 2.43248647  |
| #3    | 0.59400764   | 0.72164092   | 0.70169551   | 1.118181426 | -0.357552005 | -1.657112286 | 0.355094959  | 2.287980763 | 2.77830639  |
| #4    | 0.893084796  | 0.915864665  | 0.484411202  | 1.296981738 | -0.175086707 | -1.428843299 | 0.602036014  | 2.186998515 | 2.836501268 |
| #5    | -0.259298465 | -0.406886268 | -0.204629595 | 0.540120826 | -1.297084024 | -1.968135501 | 0.563900885  | 3.698025165 | 4.103059696 |
| #6    | 0.545497746  | 0.15560533   | 0.256818974  | 1.471675214 | -0.327574658 | -0.752072487 | 0.771871209  | 2.379643593 | 2.837874609 |
| #7    | -0.358159905 | -0.401964873 | -0.612654235 | 0.943842821 | 0.164386818  | -0.97184896  | 0.012490944  | 2.299168192 | 3.339385292 |
| #8    | 0.519275331  | -0.038033955 | -0.16211124  | 1.143153773 | -0.720909999 | -1.616440732 | -0.143835773 | 2.189680297 | 2.492554967 |
| #9    | 0.541295852  | -0.109828759 | -0.297993878 | 0.928446739 | -0.462343214 | -1.804449191 | -0.38466385  | 1.475158492 | 2.480668473 |
| #10   | 0.375318145  | -0.090521714 | -0.242318251 | 1.013610432 | -0.602158116 | -1.612574732 | 0.950531324  | 2.781654412 | 3.619663592 |
| #11   | 0.380828674  | 0.829698126  | 0.600667401  | 0.947313575 | -0.129837438 | -1.301380717 | 0.387023123  | 2.299560282 | 3.584962501 |
| #12   | -0.055210187 | 0.107324073  | -0.103126114 | 0.919780107 | -0.274174963 | -1.746243408 | -0.378511623 | 3.132450296 | 4.587272661 |
| #13   | 1.339103239  | 1.583521966  | 1.006464664  | 1.178337241 | 1.049753035  | -0.341036918 | 0.610588308  | 2.433820975 | 2.661739794 |
| #14   | 0.620506618  | 1.222392421  | 1.228687828  | 0.746643508 | 0.259562214  | -0.689212463 | 0.289506617  | 4.505326385 | 5.584294432 |
| #15   | 0.626907035  | 0.792283666  | 0.3082246    | 0.828939338 | -0.511610759 | -1.906242048 | 0.648014671  | 3.007417472 | 3.879867422 |

Log2FC(1.5)

0.584962501

#Differentially espresed genes (DEG) with Log2FC >0.5849

#or <-0.5849 are highlighted in green

#corresponding to a FC threshold of 1.5

# 2<sup>-ΔCt</sup> values (normalized to RPLP0)

| Donor | RUNX2_CRL | RUNX2_0nM | RUNX2_10nM | RUNX2_100nM | SOX9_CRL | SOX9_0nM | SOX9_10nM | SOX9_100nM | PPARG_CRL | PPARG_0nM | PPARG_10nM | PPARG_100nM |
|-------|-----------|-----------|------------|-------------|----------|----------|-----------|------------|-----------|-----------|------------|-------------|
| #1    | 0.0327    | 0.0421    | 0.0503     | 0.0491      | 0.0051   | 0.0072   | 0.0024    | 0.0014     | 0.00097   | 0.0008    | 0.0051     | 0.0073      |
| #2    | 0.0442    | 0.0404    | 0.0503     | 0.043       | 0.0042   | 0.0043   | 0.0027    | 0.0013     | 0.00113   | 0.0014    | 0.0032     | 0.0061      |
| #3    | 0.0265    | 0.04      | 0.0437     | 0.0431      | 0.0041   | 0.0089   | 0.0032    | 0.0013     | 0.00086   | 0.0011    | 0.0042     | 0.0059      |
| #4    | 0.0203    | 0.0377    | 0.0383     | 0.0284      | 0.0035   | 0.0086   | 0.0031    | 0.0013     | 0.00112   | 0.0017    | 0.0051     | 0.008       |
| #5    | 0.03471   | 0.029     | 0.02618    | 0.03012     | 0.00403  | 0.00586  | 0.00164   | 0.00103    | 0.00092   | 0.00136   | 0.01194    | 0.01581     |
| #6    | 0.0252    | 0.03678   | 0.02807    | 0.03011     | 0.00128  | 0.00355  | 0.00102   | 0.00076    | 0.00147   | 0.00251   | 0.00765    | 0.01051     |
| #7    | 0.05786   | 0.04514   | 0.04379    | 0.03784     | 0.00406  | 0.00781  | 0.00455   | 0.00207    | 0.00115   | 0.00116   | 0.00566    | 0.01164     |
| #8    | 0.04074   | 0.05839   | 0.03968    | 0.03641     | 0.00417  | 0.00921  | 0.00253   | 0.00136    | 0.00137   | 0.00124   | 0.00625    | 0.00771     |
| #9    | 0.02974   | 0.04328   | 0.02756    | 0.02419     | 0.00248  | 0.00472  | 0.0018    | 0.00071    | 0.00141   | 0.00108   | 0.00392    | 0.00787     |
| #10   | 0.03305   | 0.04287   | 0.03104    | 0.02794     | 0.00211  | 0.00426  | 0.00139   | 0.00069    | 0.00089   | 0.00172   | 0.00612    | 0.01094     |
| #11   | 0.01675   | 0.02181   | 0.02977    | 0.0254      | 0.00488  | 0.00941  | 0.00446   | 0.00198    | 0.00039   | 0.00051   | 0.00192    | 0.00468     |
| #12   | 0.03276   | 0.03153   | 0.03529    | 0.0305      | 0.00416  | 0.00787  | 0.00344   | 0.00124    | 0.00026   | 0.0002    | 0.00228    | 0.00625     |
| #13   | 0.0334    | 0.0845    | 0.1001     | 0.0671      | 0.0057   | 0.0129   | 0.0118    | 0.0045     | 0.00186   | 0.00284   | 0.01005    | 0.01177     |
| #14   | 0.0588    | 0.0904    | 0.1372     | 0.1378      | 0.0208   | 0.0349   | 0.0249    | 0.0129     | 0.00045   | 0.00055   | 0.01022    | 0.02159     |
| #15   | 0.05966   | 0.09213   | 0.10332    | 0.07387     | 0.01668  | 0.02963  | 0.0117    | 0.00445    | 0.00097   | 0.00152   | 0.0078     | 0.01428     |
